# Supplementary material
Source: Copernicus journal article supplement (doi:10.5194/egusphere-2026-3661)
Supplement: Supplementary file 1 [file egusphere-2026-3661-supplement.pdf]

1 Supplementary Materials for  
2 **How tropical cyclones drive extreme positive glacier mass**  
3 **balance in the central–eastern Himalayas**

4 Fengying Zhang<sup>a,b</sup>, Xuelin Gao<sup>a,b</sup>, Shihang Bai<sup>b,c</sup>, Ji Zhang<sup>a,b</sup>, Jing Gao<sup>c</sup>, Rinzin Lhamo<sup>f</sup>, Meilin Zhu<sup>b,\*</sup>,  
5 Huabiao Zhao<sup>c,d,\*</sup>

6 <sup>a</sup>College of Earth and Environmental Sciences, Lanzhou University, Lanzhou, 730000, China

7 <sup>b</sup>Center for the Pan-third Pole Environment, Lanzhou University, Lanzhou, 730000, China

8 <sup>c</sup>State Key Laboratory of Tibetan Plateau Earth System, Environment and Resources, Institute of Tibetan  
9 Plateau Research, Chinese Academy of Sciences, Beijing, 100101, China

10 <sup>d</sup>Ngari Station for Desert Environment Observation and Research, Institute of Tibetan Plateau Research,  
11 Chinese Academy of Sciences, Xizang, 859700, China

12 <sup>e</sup>College of Atmospheric Science, Lanzhou University, Lanzhou, 730000, China

13 <sup>f</sup>Xizang Ngari Rutog County Meteorological Bureau, Xizang, 859700, China

14 Correspondence to Meilin Zhu (zhuml@lzu.edu.cn) and Huabiao Zhao (zhaohb@itpcas.ac.cn)

|    |                              |
|----|------------------------------|
| 15 | <b>Contents of this file</b> |
| 16 | Text S1                      |
| 17 | Figure S1–S13                |
| 18 | Table S1–S3                  |

19 **Introduction**

20 We provided the calculation of the cloud cover (C) along with a description of the additional formulas  
21 related to the EBFM. Additionally, we included a table of commonly used parameter values.

22 **Supplementary Text S1. Parameterizations used in the energy and mass balance model**

23 A1: Cloud cover

24 Cloud cover was calculated using the ratio of incoming shortwave radiation ( $S_{in}$ ) to the top-of-  
25 atmosphere (TOA) radiation (Sedlar and Hock, 2009; Sicart et al., 2006).

26 
$$C = 1 - \left( \frac{S_{in}}{TOA} \right) \quad (1)$$

27 During nighttime periods, when  $S_{in}$  was zero, missing values of C were filled using linear interpolation  
28 between the last three hours of the previous day and the first three hours of the following day.

29

30 A2: Incoming shortwave radiation ( $S_{in}$ )

31 Incoming shortwave radiation is calculated considering the effects of surface slope, aspect, and  
32 shading by surrounding terrain as follows:

33 
$$S_{in} = TOA_{shade} \times t_{rg} \times t_w \times t_a \times t_{cl} \quad (2)$$

34  $TOA_{shade}$  is initially derived by calculating the TOA radiation based on latitude, slope, aspect, and solar  
35 geometry. Following Oerlemans (1992), this radiation is then partitioned into direct and diffuse  
36 components according to C and topographic shading factors.  $t_{rg}$  is the transmissivity for gaseous  
37 absorption and scattering, quantifying attenuation due to Rayleigh scattering and ozone absorption based  
38 on optical air mass (Atwater and Brown, 1974).  $t_w$  is the transmissivity for water vapor absorption,  
39 calculated from the dew point temperature and precipitable water content, which are derived from  
40 specific humidity and air pressure.  $t_a$  is the transmissivity after aerosol absorption, calculated from a  
41 simple expression (Houghton, 1954).  $t_{cl}$  is the cloud transmissivity, accounting for the nonlinear  
42 attenuation effect of C (van Pelt et al., 2012).

43 
$$t_{cl} = 1 - a_2 \times C - b_2 \times C^2 \quad (3)$$

44 The coefficients  $a_2$  and  $b_2$  were calibrated using observations from automatic weather station 1 (AWS1).

45 A3: Outgoing shortwave radiation ( $S_{out}$ )

46 The  $S_{out}$  is calculated based on surface albedo:

$$47 \quad S_{out} = alb \times S_{in} \quad (4)$$

48 where  $alb$  represents the surface albedo.

49 A4: Albedo

50 To calculate the reflected shortwave radiation at the glacier surface, a dynamic albedo parameterization  
 51 scheme was applied, in which surface albedo ( $alb$ ) is expressed as a function of snow aging, melt  
 52 conditions, snow depth, and interannual climatic variability. To account for the influence of interannual  
 53 climate variability on snow aging, the positive degree sum (PDS) of each hydrological year was used to  
 54 modulate the albedo decay timescale. The PDS was calculated over the period from May 1 to September  
 55 30. A threshold value of  $PDS_{th} = 4000$  °C was adopted to distinguish between normal and extreme warm  
 56 years. The decay timescales were defined as:

$$57 \quad t_{star} = \begin{cases} t_{wet}, t_{dry}, & PDS < PDS_{th} \\ t_{wetext}, t_{dryext}, & PDS \geq PDS_{th} \end{cases} \quad (5)$$

58 The ice albedo ( $a_{ice}$ ) was parameterized as a function of dew point temperature following a formulation  
 59 similar to Mölg et al (2008). First, an intermediate variable  $r$  was calculated as:

$$60 \quad r = \frac{17.271 \times T_a}{237.7 + T_a} + \ln\left(\frac{RH}{100}\right) \quad (6)$$

$$61 \quad T_{dew} = \frac{237.7 \times r}{17.271 - r} \quad (7)$$

62 The  $a_{ice}$  was then computed as:

$$63 \quad a_{ice} = a_1 \times T_{dew} + b_1 \quad (8)$$

64 where  $T_a$  is air temperature (°C),  $RH$  is relative humidity (%), and  $a_1$  and  $b_1$  are empirical coefficients.

65 To ensure physical realism,  $a_{ice}$  was constrained within the 0.2–0.4. The snow albedo ( $a_{snow}$ ) was assumed  
 66 to decay exponentially with snow age:

$$67 \quad a_{snow} = a_{firn} + (a_{snow} - a_{firn}) \exp\left(-\frac{t}{t_{star}}\right) \quad (9)$$

68 where  $a_{firn}$  is the albedo of firn, and  $t$  is the snow age. To account for the effect of melt conditions on

69 albedo decay, two different timescales were applied:

$$70 \quad t_{star} = \begin{cases} t_{wet}, t_{wetext}, & T_s = 0^\circ C \\ t_{dry}, t_{dryext}, & T_s < 0^\circ C \end{cases} \quad (10)$$

71 where  $T_s$  is the surface temperature. Snow age was updated based on snowfall events:

$$72 \quad t = \begin{cases} 0, & P_{snow} \geq P_{th} \\ t + \Delta t, & P_{snow} < P_{th} \end{cases} \quad (11)$$

73 where  $P_{snow}$  is snowfall and  $P_{th}$  the snowfall threshold (0.3 mm), and  $\Delta t$  is the model time step. To  
74 represent the masking effect of snow cover on underlying ice, a snow–ice transition scheme based on  
75 snow depth was applied:

$$76 \quad alb = a_{snow} + (a_{ice} - a_{snow}) \exp\left(-\frac{h_{snow}}{h^*}\right) \quad (12)$$

77 where  $h_{snow}$  is snow depth and  $h^*$  is a characteristic depth scale (0.01 m).

78 **A5: Incoming longwave radiation ( $L_{in}$ ) and outgoing longwave radiation ( $L_{out}$ )**

79 The parameterization of  $L_{in}$  used in this study follows the model of Dilley and O'Brien (1998),  
80 combined with the cloud-correction scheme of Sicart et al. (2006) that incorporates relative humidity, as  
81 suggested by Zhu et al. (2017).  $L_{in}$  is calculated as follows:

$$82 \quad L_{in} = e \times \sigma \times (T_a + 273.15)^4 \quad (13)$$

83 where  $e$  is the sky emissivity, and  $\sigma$  is the Stefan-Boltzmann constant ( $5.67 \times 10^{-8} \text{ W m}^{-2} \text{ K}^{-4}$ ).

$$84 \quad ecs = 1 - \exp\left\{-1.66 * \left[b_1 + b_2 * \frac{(T_a + 273.15)}{273.16}\right] + b_3 * \sqrt{\left(\frac{w}{25}\right)}\right\} \quad (14)$$

$$85 \quad e = ecs * (b_4 + b_5 * RH + (1 - C) * b_6) \quad (15)$$

86  $b_1, b_2, b_3, b_4, b_5,$  and  $b_6$  represent empirical constants (Table S2), which were calibrated using in situ  
87 observations from AWS2.  $T_a$  and  $RH$  are air temperature and relative humidity, respectively. The quantity  
88  $w$  is the precipitable water ( $\text{kg m}^{-2}$ ), which is estimated using the approach suggested by Prata (1996).  
89  $L_{out}$  is calculated based on the Stefan-Boltzmann law, assuming the snow and ice emit as a black body in  
90 the infrared.

$$91 \quad L_{out} = \sigma \times T_s^4 \quad (16)$$

92 **A6: Turbulent heat fluxes**

93 Sensible heat flux ( $H_{sen}$ ) and latent heat flux ( $H_{lat}$ ) are calculated following Essery (2004). The

94 calculations are expressed as follows:

$$95 \quad H_{sen} = Ch \times \rho \times Cp \times u (T_a - T_s) \quad (17)$$

$$96 \quad H_{lat} = L_h \times Ch \times \rho \times u \times [q_{sat}(T_s, P_s) - q] \quad (18)$$

97 where  $Ch$  is a surface exchange coefficient,  $\rho$  is the air density,  $C_p$  is the heat capacity of air,  $u$  is the wind  
98 speed,  $P_s$  is the air pressure, and  $q_{sat}(T_s, P_s)$  is the saturation specific humidity at  $T_s$  and  $P_s$ . The latent  
99 heat  $L_h$  depends on temperature: the latent heat of sublimation ( $L_s$ ) is used when  $T_s$  is below  $-10$  °C, the  
100 latent heat of vaporization ( $L_v$ ) is used when  $T_s$  is equal to  $0$  °C, and a linear interpolation between these  
101 two values is applied for intermediate temperatures.

102 A7: The ground heat flux

103 The ground heat flux ( $G$ ) represents the vertical conductive transfer of heat through snow or ice and is  
104 calculated following Fourier's law, as the product of an effective thermal conductivity and the  
105 temperature gradient. The calculation is expressed as:

$$106 \quad G = GHF_C \times (T_{sub} - T_s) \quad (19)$$

107 where  $GHF_C$  is the effective conductivity, a depth-weighted average of the conductivities of the first two  
108 subsurface layers that depend on the subsurface depth according to Sturm et al. (1997), and  $T_{sub}$  represents  
109 the internal snow or ice temperature beneath the surface.

110 A8: Subsurface model

111 The evolution of vertical profiles of temperature, density, and water content is simulated using a  
112 subsurface model based on the SOMARS model developed by Greuell and Konzelmann (1994).  
113 SOMARS has been coupled to a distributed energy balance model in previous studies (Bougamont et al.,  
114 2005; Reijmer and Hock, 2008). The subsurface temperature evolution is described by the following  
115 thermodynamic equation:

$$116 \quad \rho_l c_\rho(T) \frac{\partial T}{\partial t} = \frac{\partial}{\partial z} (K(\rho)) \frac{\partial T}{\partial z} + \frac{FL_m}{\Delta z} \quad (20)$$

$$117 \quad K(\rho) = 0.138 - 1.01 \times 10^{-3} + 3.23 \times 10^{-6} \rho_l^2 \quad (21)$$

$$118 \quad c_\rho(T) = 152.2 + 7.122T \quad (22)$$

119 where  $\rho_l$  is the layer density,  $T$  is the layer temperature,  $F$  is the refreezing rate and  $L_m$  is the latent heat

120 of melting,  $z$  is the layer thickness,  $c_\rho(T)$  is the heat capacity of snow/ice (Yen, 1981), and  $K(\rho)$  is the  
 121 effective conductivity (Sturm et al., 1997).

122 Refreezing consists mainly of surface meltwater or rain water:

$$123 \quad C1 = \frac{c_\rho(T)}{L_M} \int_0^n \rho \Delta T dz \quad (23)$$

$$124 \quad C2 = \int_0^n \left(1 - \frac{\rho_l}{\rho_{ice}}\right) \rho_{ice} dz \quad (24)$$

$$125 \quad ref = \begin{cases} \max(C2, 0), & \text{if } C1 \geq C2 \\ \max(C1, 0), & \text{if } C1 < C2 \end{cases} \quad (25)$$

126 where  $n$  is the number of layers,  $\rho_{ice}$  is the density of the ice,  $\Delta T$  is the difference between the surface  
 127 temperature and the layer temperature, and  $ref$  is the maximum amount of refreezing.

128 A9: Snowfall ( $P_{snow}$ )

129  $P_{snow}$  is calculated by the total daily precipitation ( $P$ ) and two critical air temperature thresholds for  
 130 rain ( $T_{rain}$ ) and snow ( $T_{snow}$ ). Within the two temperature ranges,  $P_{snow}$  was calculated from linear  
 131 interpolation as the following equation:

$$132 \quad P_{snow} = \begin{cases} P & T \leq T_{snow} \\ \frac{T_{rain} - T}{T_{rain} - T_{snow}} P & T_{snow} < T < T_{rain} \\ 0 & T \geq T_{rain} \end{cases} \quad (26)$$

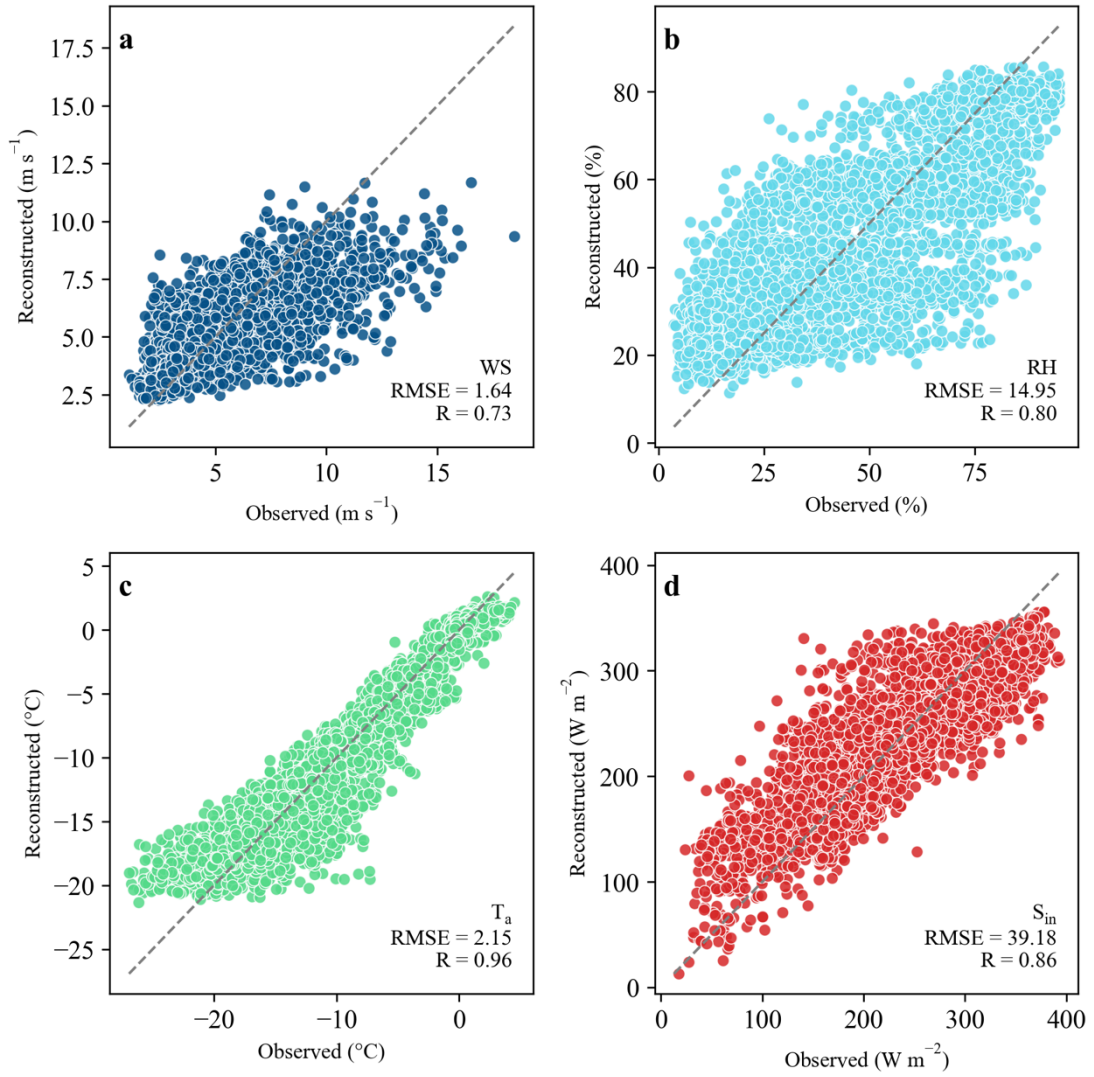

133

134 **Supplementary Figure. 1.** Comparisons between reconstructed and observed meteorological variables  
 135 at AWS1. (a) air temperature ( $T_a$ ,  $^{\circ}\text{C}$ ), (b) relative humidity (RH, %), (c) wind speed (WS,  $\text{m s}^{-1}$ ), and (d)  
 136 incoming shortwave radiation ( $S_{in}$ ,  $\text{W m}^{-2}$ ).

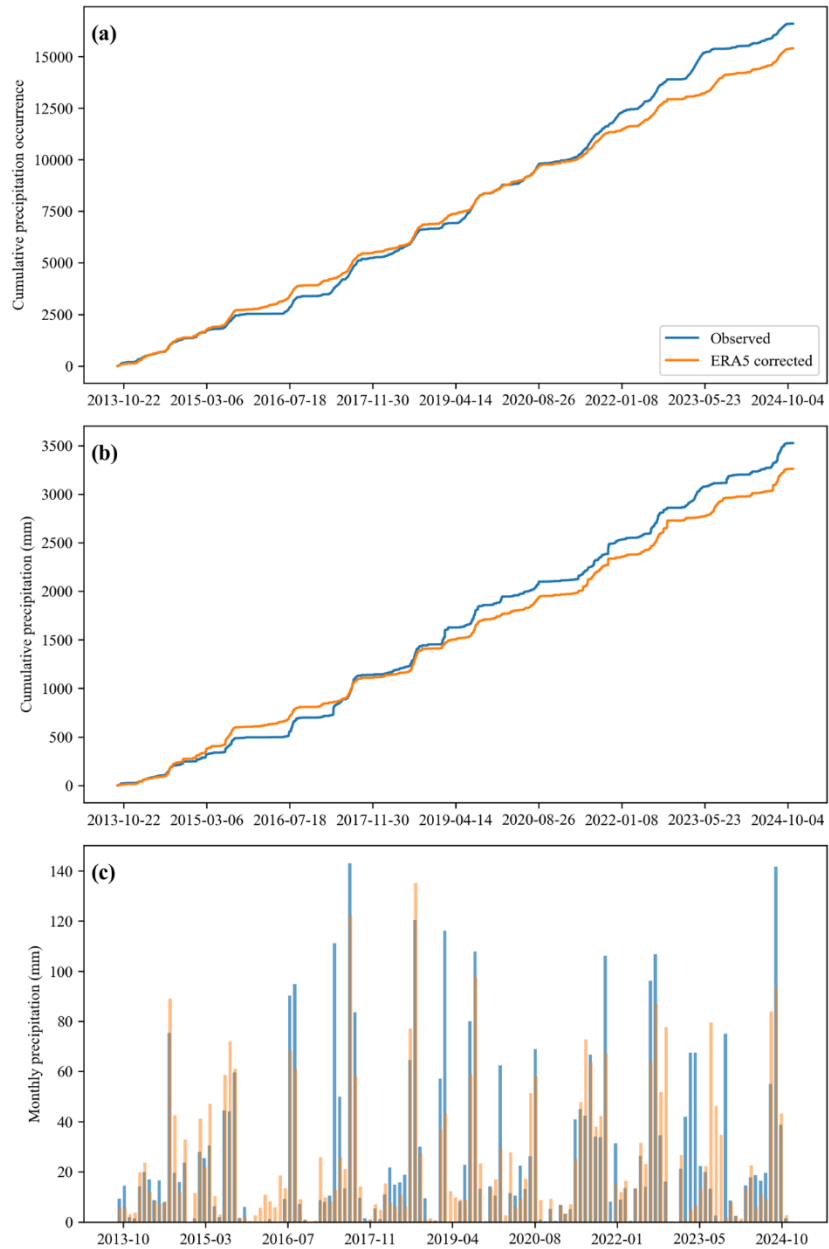

137

138 **Supplementary Figure 2.** Comparison of (a) cumulative precipitation occurrence, (b) cumulative  
 139 precipitation amount, and (c) monthly precipitation between the T-200B precipitation gauge and  
 140 reconstructed precipitation data from ERA5 during the observational period.

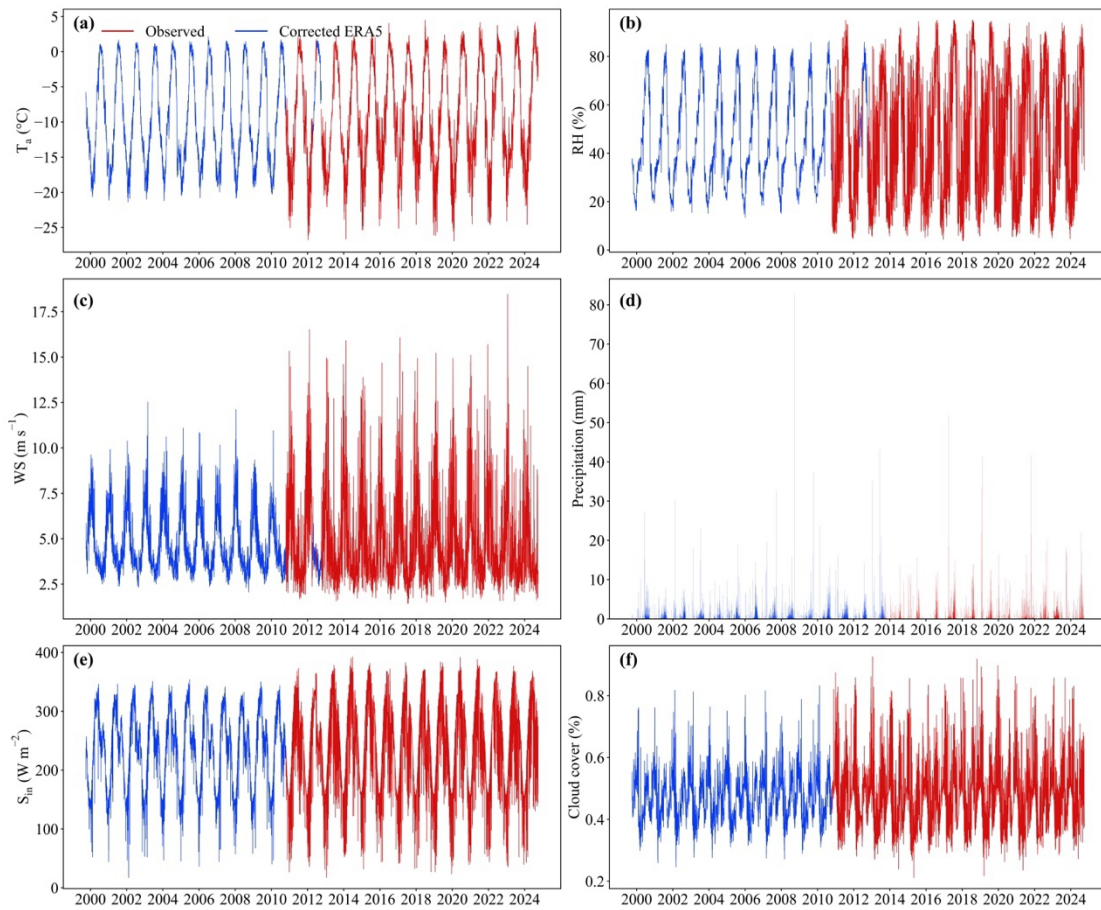

141  
 142  
 143  
 144  
 145

**Supplementary Figure. 3.** Observed (red) and corrected ERA5 (blue) daily meteorological variables over the period 1999–2024. (a) air temperature ( $T_a$ , °C), (b) relative humidity (RH, %), (c) wind speed (WS,  $\text{m s}^{-1}$ ), (d) precipitation (mm), (e) incoming shortwave radiation ( $S_{in}$ ,  $\text{W m}^{-2}$ ), and (f) cloud cover (%).

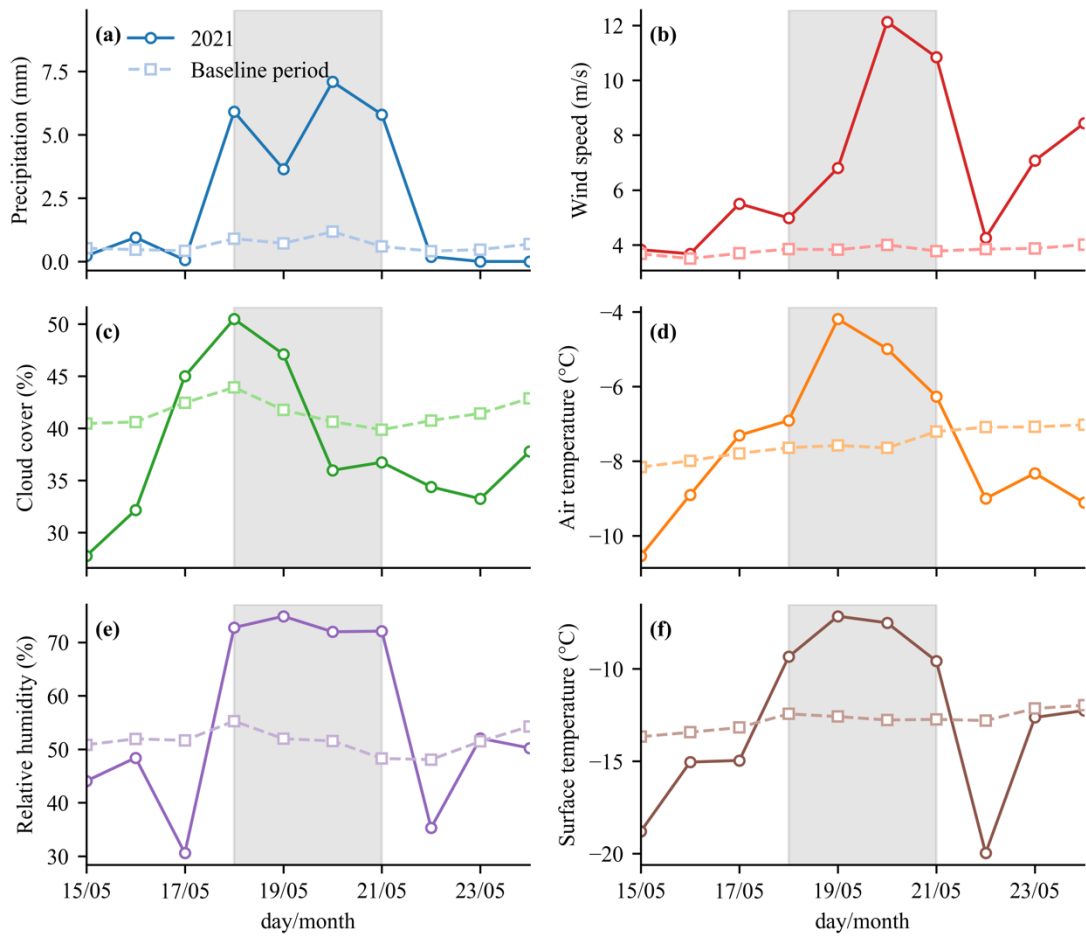

146

147 **Supplementary Figure. 4.** Daily variability of meteorological variables during May 15–23. (a)  
 148 Precipitation (mm), (b) wind speed ( $\text{m s}^{-1}$ ), (c) cloud cover (%), (d) Air temperature ( $^{\circ}\text{C}$ ), (e)  
 149 relative humidity (%) and (f) surface temperature ( $^{\circ}\text{C}$ ). The solid line with circle markers indicates the values in  
 150 2021, while the dashed line with square markers represents the mean of the baseline period (2000–2024).

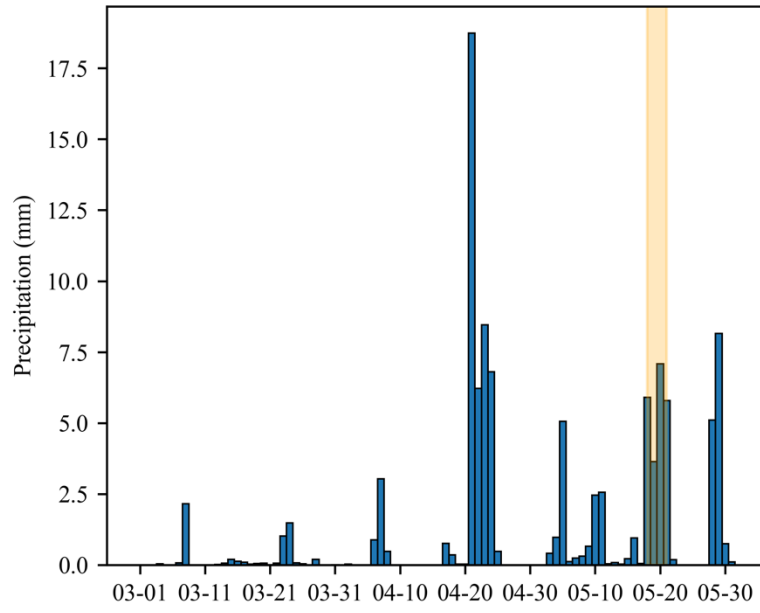

151

152 **Supplementary Figure. 5.** Daily precipitation from March 1–May 30, 2021. The yellow shaded area  
153 indicates the TC period.

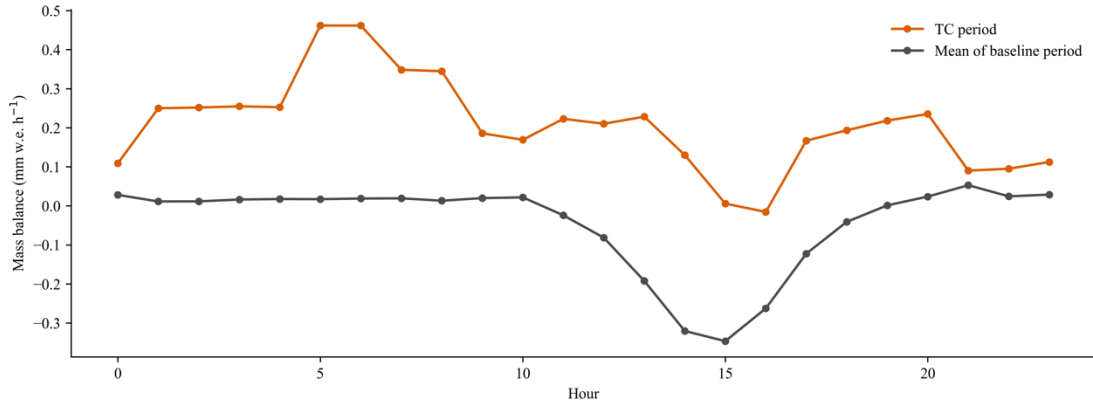

154

155 **Supplementary Figure. 6.** Hourly mass balance variations during the TC period and the baseline period,

156 with orange representing the TC period and black representing the baseline period.

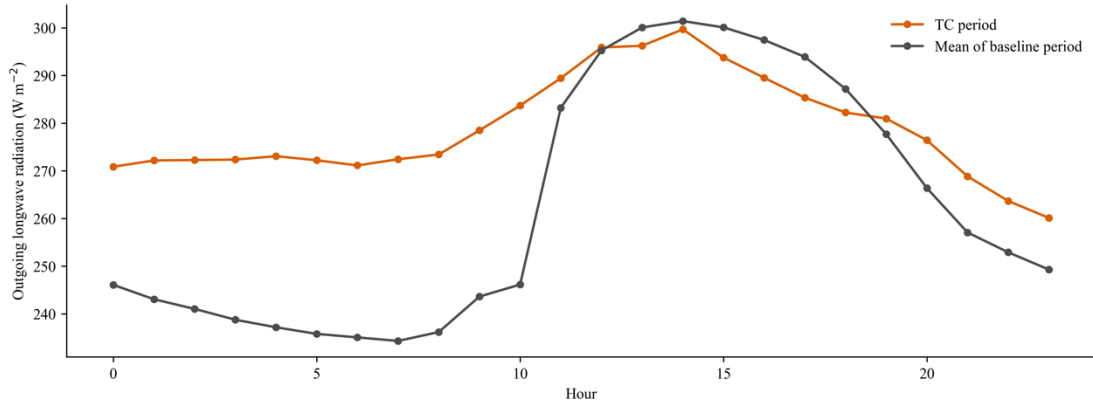

157

158 **Supplementary Figure. 7.** Hourly outgoing longwave radiation ( $L_{out}$ ,  $W m^{-2}$ ) during the TC period and

159 the baseline period, with orange representing the TC period and black representing the baseline period.

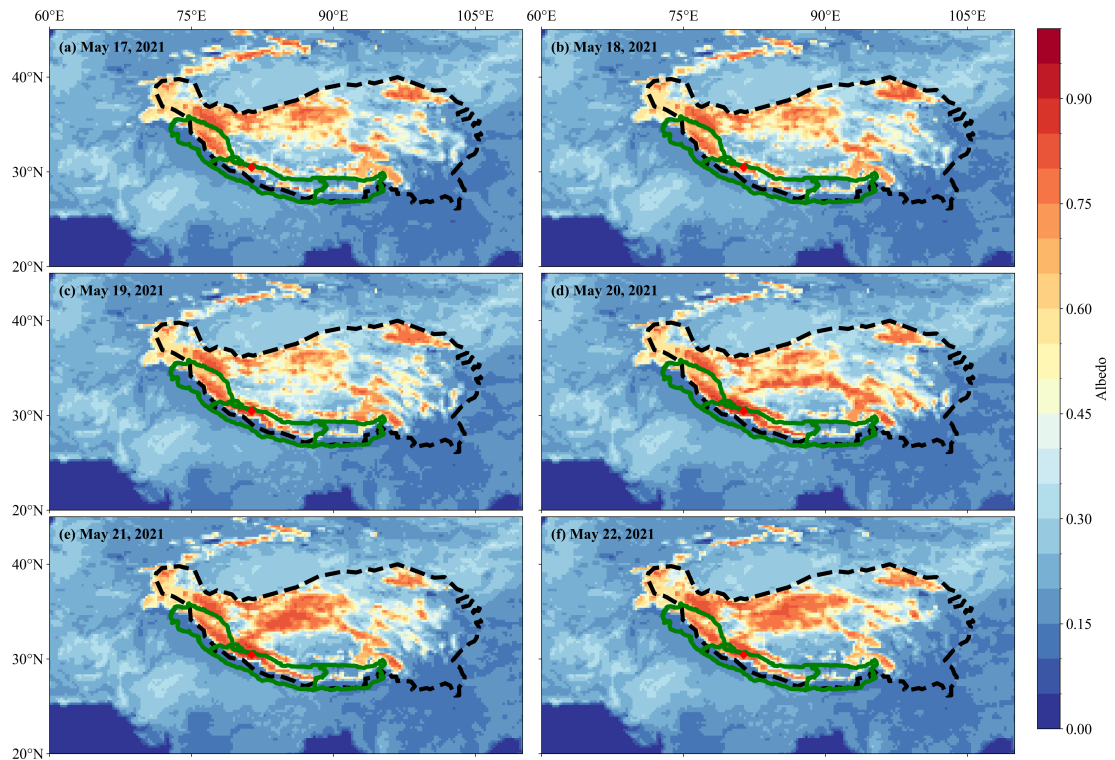

160

161 **Supplementary Figure. 8.** Spatial distribution of daily albedo from ERA5 data over the Tibetan Plateau  
 162 and surrounding regions from May 17 to 22, 2021. The black dashed line denotes the boundary of the  
 163 Tibetan Plateau, while the green solid line represents the extent and subdivision of the Himalayas. The  
 164 red diamond markers indicate the location of Naimona'nyi Glacier. Panels (a)–(f) correspond to May 17–  
 165 22, 2021, respectively.

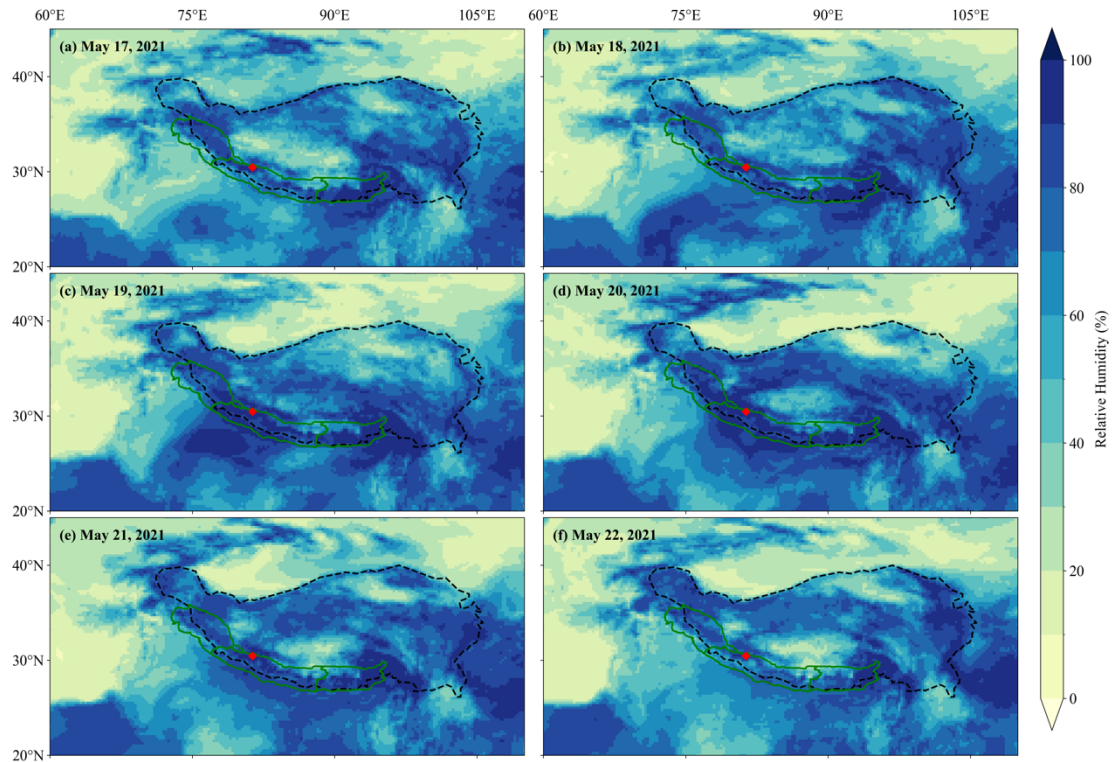

166

167 **Supplementary Figure. 9.** Spatial distribution of daily mean relative humidity from ERA5 reanalysis  
 168 data over the Tibetan Plateau and surrounding regions from May 17 to 22, 2021. The black dashed line  
 169 denotes the boundary of the Tibetan Plateau, while the green solid line represents the extent and  
 170 subdivision of the Himalayas. The red diamond markers indicate the location of Naimona'nyi Glacier.  
 171 Panels (a)–(f) correspond to May 17–22, 2021, respectively.

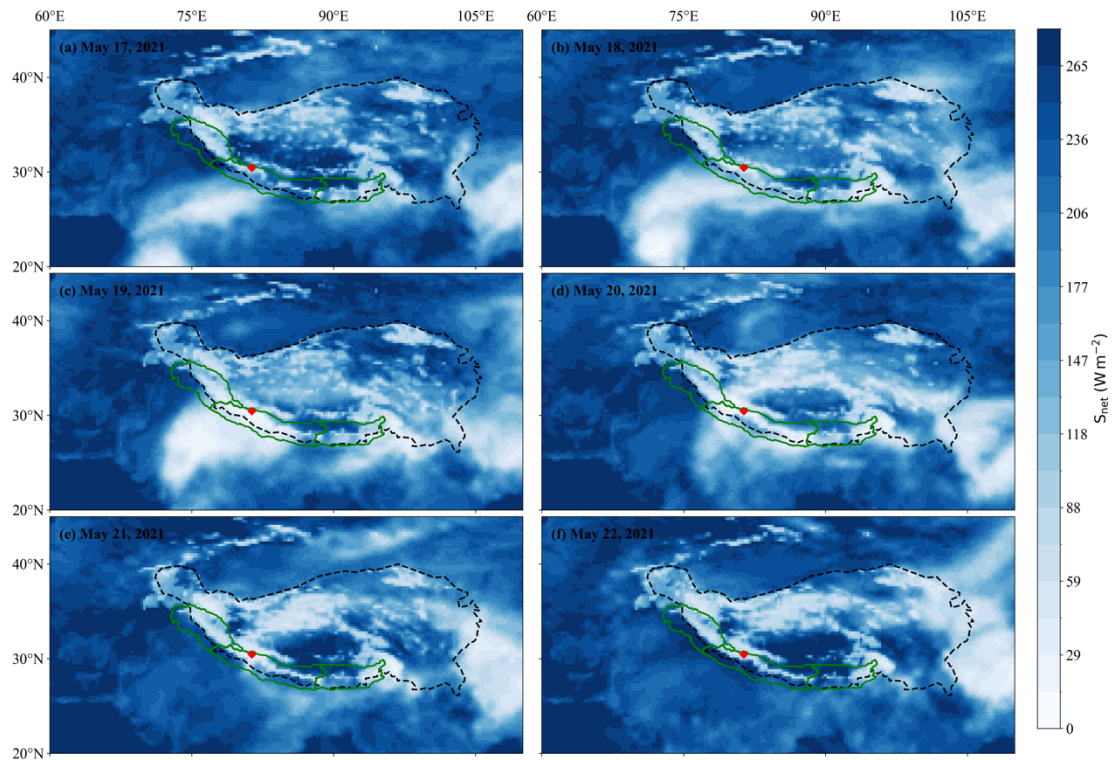

172

173 **Supplementary Figure. 10.** Spatial distribution of daily net shortwave radiation from ERA5 reanalysis  
 174 data over the Tibetan Plateau and surrounding regions from May 17–22, 2021. The black dashed line  
 175 denotes the boundary of the Tibetan Plateau, while the green solid line represents the extent and  
 176 subdivision of the Himalayas. The red diamond markers indicate the location of Naimona'nyi Glacier.  
 177 Panels (a)–(f) correspond to May 17–22, 2021, respectively.

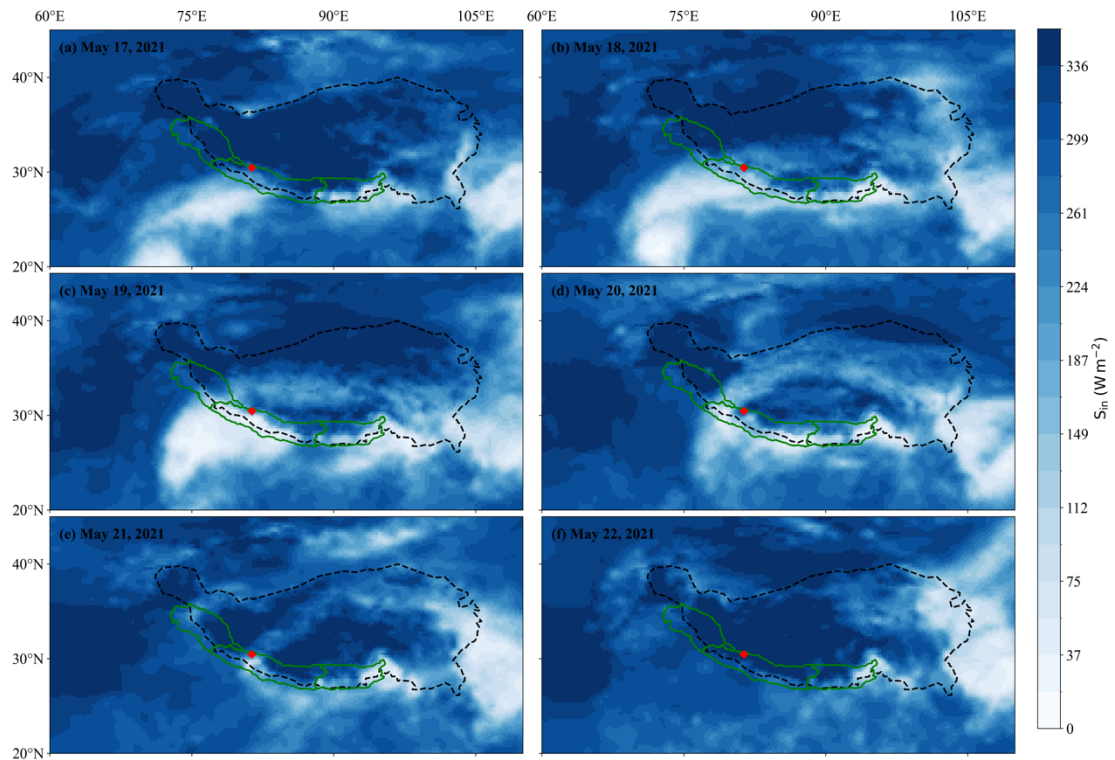

178

179 **Supplementary Figure. 11.** Spatial distribution of daily incoming shortwave radiation ( $S_{in}$ ) from ERA5  
 180 reanalysis data over the Tibetan Plateau and surrounding regions from May 17–22, 2021. The black  
 181 dashed line denotes the boundary of the Tibetan Plateau, while the green solid line represents the extent  
 182 and subdivision of the Himalayas. The red diamond markers indicate the location of Naimona'nyi Glacier.  
 183 Panels (a)–(f) correspond to May 17–22, 2021, respectively.

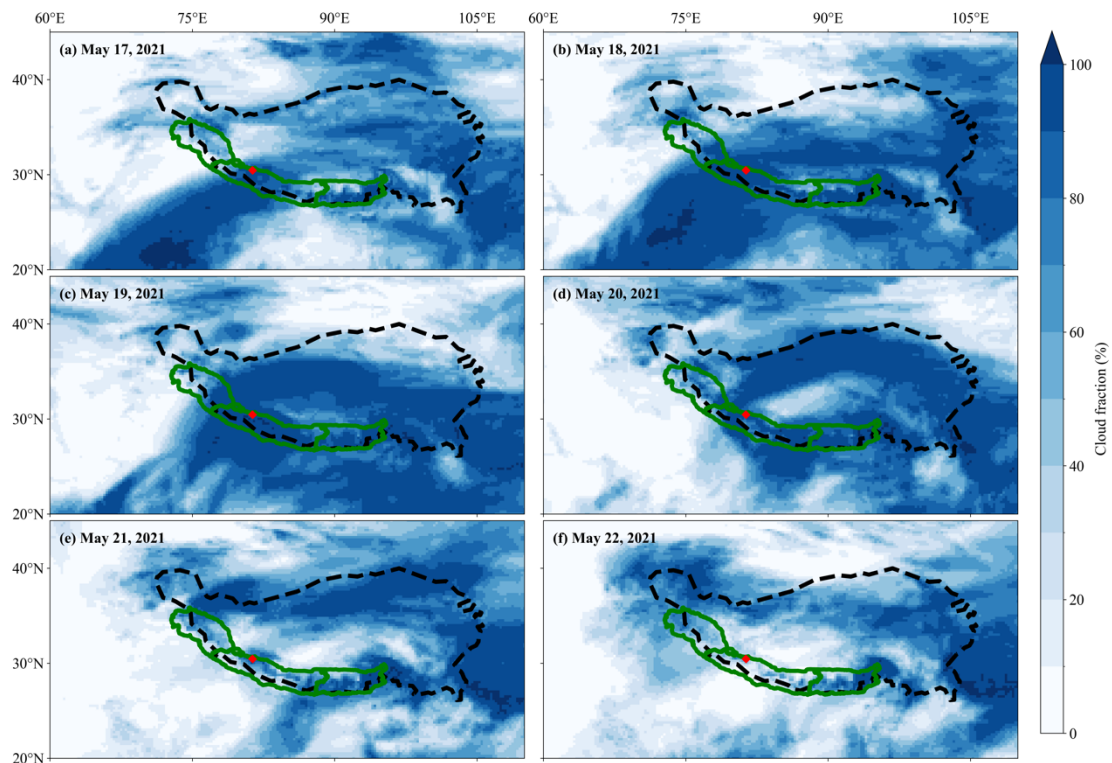

184

185 **Supplementary Figure. 12.** Spatial distribution of cloud fraction from ERA5 reanalysis data over the  
 186 Tibetan Plateau and surrounding regions from May 17–22, 2021. The black dashed line denotes the  
 187 boundary of the Tibetan Plateau, while the green solid line represents the extent and subdivision of the  
 188 Himalayas. The red diamond markers indicate the location of Naimona'nyi Glacier. Panels (a)–(f)  
 189 correspond to May 17–22, 2021, respectively.

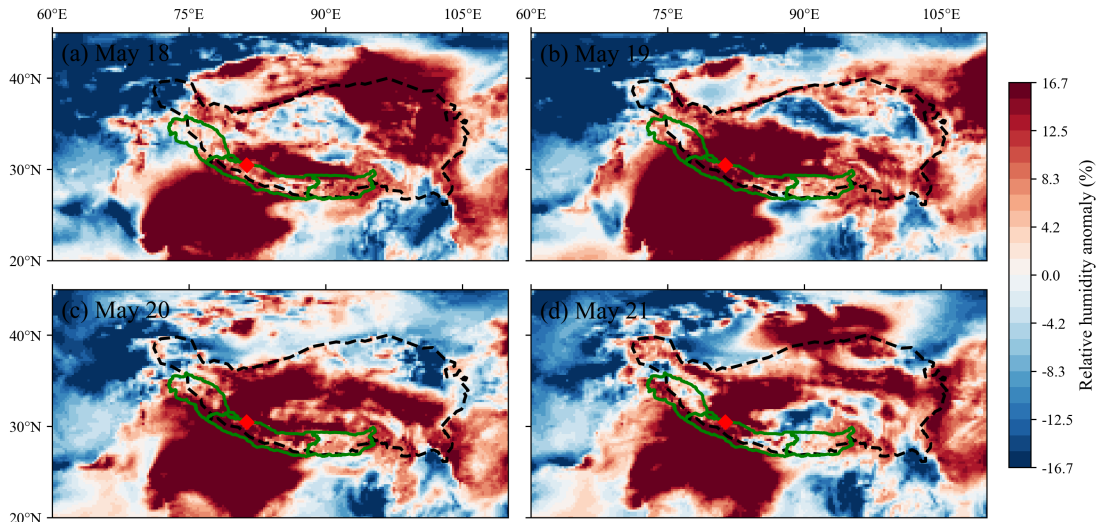

190

191 **Supplementary Figure. 13.** Spatial distribution of daily relative humidity anomalies over the Tibetan  
 192 Plateau during May 18–21, 2021. Panels (a–d) correspond to May 18, May 19, May 20, and May 21,  
 193 respectively. The black dashed line outlines the Tibetan Plateau boundary, while the green solid line  
 194 indicates the extent and sub-regions of the Himalayas. Red diamonds mark the location of Naimona'nyi  
 195 Glacier. Anomalies are defined relative to the 2000–2024 climatological mean for the corresponding day  
 196 of the year.

197 **Table S1.** Characteristics of the sensors installed in the eddy covariance system for measuring turbulent  
 198 fluxes and meteorological variables in this study.

| Parameters                             | Sensors                                                     | Accuracy                                                                                                           | Height (m) | Location               |
|----------------------------------------|-------------------------------------------------------------|--------------------------------------------------------------------------------------------------------------------|------------|------------------------|
| $T_a$                                  | Vaisala HMP 45C                                             | $\pm 0.2^\circ\text{C}$ ( $-40$ to $+60^\circ\text{C}$ )                                                           | 2.5        | AWS2 and AWS3          |
|                                        | Campbell CS215                                              | $\pm 0.4^\circ\text{C}$ ( $5$ to $40^\circ\text{C}$ ),<br>$\pm 0.9^\circ\text{C}$ ( $-40$ to $+40^\circ\text{C}$ ) | 3          | AWS1                   |
|                                        | Hobo MX2301                                                 | $\pm 0.2^\circ\text{C}$ ( $0$ to $70^\circ\text{C}$ ),<br>$\pm 0.25^\circ\text{C}$ ( $-40$ to $0^\circ\text{C}$ )  | 2.2        | T1, T2, T3, T4, and T5 |
| $RH$                                   | Vaisala HMP 45C                                             | $\pm 2.5\%$ ( $0$ – $100\%$ )                                                                                      | 2.5        | AWS2 and AWS3          |
|                                        | Campbell CS215                                              | $\pm 5\%$ ( $<10\%$ or $>90\%$ )                                                                                   | 3          | AWS1                   |
|                                        | Hobo MX2301                                                 | $\pm 2\%$ ( $10$ – $90\%$ )<br>$\pm 4\%$ ( $0$ – $100\%$ )                                                         | 2.2        | T1, T2, T3, T4, and T5 |
| $WS$                                   | Young 05103 wind monitor                                    | $\pm 0.3$ m/s                                                                                                      | 3          | AWS1 and AWS2          |
| $P$                                    | T-200B                                                      | $\pm 0.1$ mm                                                                                                       | 1.5        | AWS1                   |
| $S_{in}$                               | LICOR LI200X Silicon Pyranometer                            | $\pm 5\%$ ( $-40$ to $+65^\circ\text{C}$ )                                                                         | 2.5        | AWS1                   |
|                                        | Campbell CS300                                              | 5% for daily totals                                                                                                | 2.5        | AWS1                   |
| $S_{in}$ and $S_{out}$                 | Huxeflux NR01                                               | $\pm 1.8\%$                                                                                                        | 2          | AWS2 and AWS3          |
| $L_{in}$ and $L_{out}$                 |                                                             | $\pm 7\%$                                                                                                          | 2          |                        |
| $Press$                                | Vaisala PTB210                                              | $\pm 0.35$ hPa                                                                                                     | 1.2        | AWS2                   |
| $\text{CO}_2$ and $\text{H}_2\text{O}$ | Li-7500 open-path $\text{CO}_2/\text{H}_2\text{O}$ analyzer | $<1\%$ ( $-25$ to $+50^\circ\text{C}$ )                                                                            | 2.5        | AWS3                   |
| $u'$ and $v'$                          |                                                             | $10$ mm $\text{s}^{-1}$ ( $0$ – $65$ m                                                                             |            |                        |
| $w'$                                   | WindMaster Pro                                              | $\text{s}^{-1}$ )                                                                                                  | 2.5        | AWS3                   |
| $T'$                                   |                                                             | $1$ mm $\text{s}^{-1}$                                                                                             |            |                        |

0.01°C (-40°C to  
+50°C)

---

199

**Table S2.** Input Parameters for the EBFM Model.

| Abbreviation   | Parameter                                                                                                  | Values                                           |
|----------------|------------------------------------------------------------------------------------------------------------|--------------------------------------------------|
| $T_{rate1}$    | vertical air temperature gradient ( $^{\circ}\text{C } 100\text{m}^{-1}$ )<br>above 5919                   | -0.69                                            |
| $T_{rate2}$    | vertical air temperature gradient ( $^{\circ}\text{C } 100\text{m}^{-1}$ )<br>below 5919                   | -0.84                                            |
| $P_{rate1}$    | vertical precipitation gradient ( $\% \text{ m}^{-1}$ ) above<br>5800m                                     | 0.086                                            |
| $P_{rate2}$    | vertical precipitation gradient ( $\% \text{ m}^{-1}$ ) below<br>5800m                                     | 0.02                                             |
| $T_{rainsnow}$ | temperature of snow to rain transition (K)                                                                 | 274.15                                           |
| $alb_{snow}$   | fresh snow albedo                                                                                          | 0.85                                             |
| $alb_{firn}$   | firn albedo                                                                                                | 0.55                                             |
| $t_{wet}$      | albedo time scale when surface temperature equal<br>to 0                                                   | 14                                               |
| $t_{dry}$      | albedo time scale when surface temperature<br>smaller than 0                                               | 18                                               |
| $t_{wetext}$   | albedo time scale for wet snow ( $T_s = 0 \text{ }^{\circ}\text{C}$ ) under<br>extreme climate conditions. | 3.9                                              |
| $t_{dryext}$   | albedo time scale for dry snow ( $T_s < 0 \text{ }^{\circ}\text{C}$ ) under<br>extreme climate conditions. | 8                                                |
| $a$            | Parameter for Ice albedo model                                                                             | -0.0253                                          |
| $b$            | Parameter for Ice albedo model                                                                             | 0.2577                                           |
| $b_1-b_6$      | parameters of $L_{in}$ model                                                                               | -0.39, 0.938,<br>1.168, 0.752,<br>0.0031, -0.086 |
| $z_0$          | bulk coefficient of turbulent heat flux (m)                                                                | 0.0004                                           |

**Table S3.** Free parameters in the energy and mass balance model and their range and the optimal values.

| Symbol          | Parameter                                                          | Values                      | Range<br>used for<br>uncertainty<br>estimation | Mean mass balance<br>sensitivity (m w.e. day <sup>-1</sup> ) |                   |
|-----------------|--------------------------------------------------------------------|-----------------------------|------------------------------------------------|--------------------------------------------------------------|-------------------|
|                 |                                                                    |                             |                                                | Baseline<br>period                                           | 2021 TC<br>period |
| $a_{freshsnow}$ | Fresh snow albedo                                                  | 0.85                        | ±10%                                           | 0.32                                                         | 0.35              |
| $a_{firm}$      | Firn albedo                                                        | 0.55                        | ±10%                                           | 0.38                                                         | 0.01              |
| $t_{wet}$       | Albedo time scale<br>when surface<br>temperature equal to 0        | 14                          | ±10%                                           | 0.02                                                         | 0                 |
| $t_{dry}$       | Albedo time scale<br>when surface<br>temperature smaller than<br>0 | 18                          | ±10%                                           | 0                                                            | 0                 |
| $a$             | Parameter for Ice<br>albedo model                                  | -0.0253                     | ±10%                                           | 0                                                            | 0                 |
| $b$             | Parameter for Ice<br>albedo model                                  | 0.2577                      | ±10%                                           | 0                                                            | 0                 |
| $\Delta P_1$    | Vertical precipitation<br>gradient above 5800 m<br>a.s.l.          | 8.6%<br>100 m <sup>-1</sup> | ±10%                                           | 0.01                                                         | 0.03              |
| $\Delta P_2$    | Vertical precipitation<br>gradient above 5800 m<br>a.s.l.          | 2% 100<br>m <sup>-1</sup>   | ±10%                                           | 0.01                                                         | 0.03              |
| $T_{snow/rain}$ | Phase threshold for<br>snow/rain                                   | 1 °C                        | ±10%                                           | 0.02                                                         | 0                 |
| $z_0$           | Roughness length of<br>turbulent heat flux                         | 0.0004<br>m                 | ±10%                                           | 0                                                            | 0.01              |
|                 | Total uncertainty                                                  |                             |                                                | 0.16                                                         | 0.11              |

205       **References**

- 206       Atwater, M.A., Brown, P.S., 1974. Numerical Computations of the Latitudinal Variation of Solar  
207       Radiation for an Atmosphere of Varying Opacity. *Journal of Applied Meteorology* (1962-1982)  
208       13, 289–297. <https://www.jstor.org/stable/26176296>
- 209       Bougamont, M., Bamber, J.L., Greuell, W., 2005. A surface mass balance model for the Greenland  
210       Ice Sheet. *Journal of Geophysical Research: Earth Surface* 110.  
211       <https://doi.org/10.1029/2005JF000348>
- 212       Dilley, A. C., and D. M. O'Brien, 1998: Estimating downward clear sky long-wave irradiance at the  
213       surface from screen temperature and precipitable water. *Quart. J. Roy. Meteor. Soc.*, 124, 1391–  
214       1401, doi:10.1002/qj.49712454903.
- 215       Essery, R., Etchevers, P., 2004. Parameter sensitivity in simulations of snowmelt. *Journal of*  
216       *Geophysical Research: Atmospheres* 109. <https://doi.org/10.1029/2004JD005036>
- 217       Greuell, W., Konzelmann, T., 1994. Numerical modelling of the energy balance and the englacial  
218       temperature of the Greenland Ice Sheet. Calculations for the ETH-Camp location (West  
219       Greenland, 1155 m a.s.l.). *Global and Planetary Change, Greenland ice margin experiment*  
220       (GIMEx) 9, 91–114. [https://doi.org/10.1016/0921-8181\(94\)90010-8](https://doi.org/10.1016/0921-8181(94)90010-8)
- 221       Houghton, H.G., 1954. ON THE ANNUAL HEAT BALANCE OF THE NORTHERN  
222       HEMISPHERE. *Journal of the Atmospheric Sciences* 11, 1–9. [https://doi.org/10.1175/1520-0469\(1954\)011%253C0001:OTAHBO%253E2.0.CO;2](https://doi.org/10.1175/1520-0469(1954)011%253C0001:OTAHBO%253E2.0.CO;2)
- 224       Mölg, T., Cullen, N.J., Hardy, D.R., Kaser, G., Klok, L., 2008. Mass balance of a slope glacier on  
225       Kilimanjaro and its sensitivity to climate. *International Journal of Climatology* 28, 881–892.  
226       <https://doi.org/10.1002/joc.1589>
- 227       Oerlemans, J., 1992. Climate sensitivity of glaciers in southern Norway: application of an energy-  
228       balance model to Nigardsbreen, Hellstugubreen and Alftobreen. *Journal of Glaciology* 38,  
229       223–232. <https://doi.org/10.3189/S0022143000003634>
- 230       Prata, A. J., 1996: A new, long-wave formula for estimating downward clear-sky radiation at the  
231       surface. *Quart. J. Roy. Meteor. Soc.*, 122, 1127–1151, doi:10.1002/qj.49712253306.
- 232       Reijmer, C.H., Hock, R., 2008. Internal accumulation on Storglaciären, Sweden, in a multi-layer  
233       snow model coupled to a distributed energy- and mass-balance model. *Journal of Glaciology*

234 54, 61–72. <https://doi.org/10.3189/002214308784409161>

235 Sedlar, J., Hock, R., 2009. Testing longwave radiation parameterizations under clear and overcast  
236 skies at Storglaciären, Sweden. *The Cryosphere* 3, 75–84. <https://doi.org/10.5194/tc-3-75-2009>

237 Sicart, J.E., Pomeroy, J.W., Essery, R.L.H., Bewley, D., 2006. Incoming longwave radiation to  
238 melting snow: observations, sensitivity and estimation in Northern environments. *Hydrological*  
239 *Processes* 20, 3697–3708. <https://doi.org/10.1002/hyp.6383>

240 Sturm, M., Holmgren, J., König, M., Morris, K., 1997. The thermal conductivity of seasonal snow.  
241 *Journal of Glaciology* 43, 26–41. <https://doi.org/10.3189/S0022143000002781>

242 van Pelt, W.J.J., Oerlemans, J., Reijmer, C.H., Pohjola, V.A., Pettersson, R., van Angelen, J.H., 2012.  
243 Simulating melt, runoff and refreezing on Nordenskiöldbreen, Svalbard, using a coupled snow  
244 and energy balance model. *The Cryosphere* 6, 641–659. <https://doi.org/10.5194/tc-6-641-2012>

245 Yen, Y.-C., 1981. Review of Thermal Properties of Snow, Ice, and Sea Ice. U.S. Army, Corps of  
246 Engineers, Cold Regions Research and Engineering Laboratory.

247 Zhu, M., Yao, T., Yang, W., Xu, B., & Wang, X. 2017. Evaluation of parameterizations of incoming  
248 longwave radiation in the high-mountain region of the Tibetan Plateau. *Journal of Applied*  
249 *Meteorology and Climatology*, 56(4), 833-848.

250
